# Supplementary material for: Ubiquitin recognition of BAP1: understanding its enzymatic function
Source: PubMed Central journal article supplement (PMC5665613; doi:10.1042/bsr20171099), 2017-10-27
Supplement: BSR20171099_Supp1.pdf [file BSR20171099_Supp1.pdf]

## Supplementary Information

### Ubiquitin Recognition of BAP1: Understanding its Enzymatic Function

Pranita Hanpude<sup>1,2</sup>, Sushmita Bhattacharya<sup>1</sup>, Abhishek Kumar Singh<sup>1</sup> and Tushar Kanti Maiti<sup>1\*</sup>

<sup>1</sup>Laboratory of Functional Proteomics, Regional Centre for Biotechnology, NCR Biotech Science Cluster, 3<sup>rd</sup> Milestone Gurgaon-Faridabad Expressway, Faridabad, Haryana 121001, INDIA.

<sup>2</sup>Manipal University, Karnataka, 576104, INDIA.

\* Correspondence and requests for materials should be addressed to Tushar K. Maiti.  
(Email: [tkmaiti@rcb.res.in](mailto:tkmaiti@rcb.res.in))

#### Supplementary Figure legends:

**Supplementary Figure S1. Multiple sequence alignment of BAP1 with human UCHL5, UCHL1, UCHL3 and *TsUCH37*.** Structure based sequence alignment of UCH domain of BAP1 with other known human UCHs and *Trichinella spiralis* ubiquitin hydrolase *TsUCH37*. Catalytic residues of BAP1 (blue colored asterisks), conserved among the UCHs and *TsUCH37*, are highlighted in blue. Residues highlighted in yellow are important for ubiquitin binding, curated from the ubiquitin bound crystal structure data of human UCHL1, UCHL3, UCHL5 and *TsUCHL5*. The proposed BAP1N residues interacting with ubiquitin are shown with red colored asterisks and similar residues in other UCHs highlighted in red. Active site crossover loop residues are highlighted in green.

**Supplementary Figure S2. Effect of salt on kinetics of Ub-AMC hydrolysis.** Rate of Ub-AMC hydrolysis by wild-type BAP1N and catalytic domain mutants E7Q, S10A, E31Q, Y33A, E148Q, I214A, T218A, R227A, F228H and L230A in without salt reaction buffer (50 mM Tris-HCl, pH 7.6, 5 mM DTT, 0.5 mM EDTA, 0.1% of BSA) shown in pink and with salt (50 mM Tris-HCl, pH 7.6, 150 mM NaCl, 5 mM DTT, 0.5 mM EDTA, 0.1% of BSA) is shown in red. The values are the mean  $\pm$  standard deviation of at least two experiments (P value < 0.05).

**Supplementary Figure S3. Thermal stability of mutants by CD.** Complete temperature unfolding profile at 222 nm demonstrated distinct unfolding nature of wild-type BAP1N shown in red and mutants shown in blue. Melting temperatures were obtained from sigmoidal fits over the range of 25 °C to 75 °C controlled by Peltier control system using 0.2 cm path length cuvette. The protein concentration was 7  $\mu$ M in 50 mM Tris, pH 7.4 and 150 mM NaCl. Solid line represents the sigmoidal curve fitting.

**Supplementary Figure S4. Secondary Structure studies of BAP1N carrying double mutations.** Circular dichroism spectra at 25 °C of BAP1N C91S and proposed ubiquitin interacting residues of BAP1N with C91S double mutation showed similar characteristic secondary-structure between 190–260 nm as that of BAP1N C91S. Black curves represents BAP1N C91S and ubiquitin interaction specific double mutants are shown in red.

**Supplementary Figure S5. Sensograms for the binding of UCHL5 C88S with ubiquitin.** UCHL5 C88S of concentration ranging from 0-50  $\mu$ M in 50 mM Tris,

pH 7.4 and 150 mM NaCl were perfused over ubiquitin immobilized covalently on a CM5 Sensor Chip. Representative sensograms show binding profile of UCHL5 C88S protein.

## Supplementary Figure S1

|     |                                                                                                                                                                                |     |            |                      |
|-----|--------------------------------------------------------------------------------------------------------------------------------------------------------------------------------|-----|------------|----------------------|
| 1   | ---M <sup>*</sup> NK <sup>*</sup> GWLELES <sup>*</sup> DPGLFTLLVEDFGVKGV-QVEE <sup>*</sup> IYDLQSK---CQGPVYGFIFL <sup>*</sup> FKW                                              | 52  | Q92560     | BAP1_HUMAN           |
| 1   | MTGNAGEWCLMESDPGVFTELIKFGGCRGA-QVEE <sup>*</sup> I <sup>*</sup> NSLEPENFE-KLKPVHGLIFL <sup>*</sup> FKW                                                                         | 58  | Q9Y5K5     | UHL5_HUMAN           |
| 1   | --MAEGNWCLIE <sup>*</sup> SDPGIFTEMIHGFGCTGL-QVEE <sup>*</sup> ELV <sup>*</sup> VLD-ESIE-HLKPIHGFI <sup>*</sup> FLFRW                                                          | 56  | A0A0V0WDD0 | UHL5_Trichinella Sp. |
| 1   | ----MQLK <sup>*</sup> PM <sup>*</sup> EINPEMLNKVLSRLGVAGQWR <sup>*</sup> FVDV <sup>*</sup> LGLEESLGSVPAPACALL <sup>*</sup> LPPL                                                | 55  | P09936     | UHL1_HUMAN           |
| 1   | --MEGQRWLPLEAN <sup>*</sup> PEVTNQFLKQLGLHPNWQF <sup>*</sup> VDV <sup>*</sup> YGM <sup>*</sup> DPE <sup>*</sup> ELLSM <sup>*</sup> VPRPVC <sup>*</sup> AVLLE <sup>*</sup> LPFI | 58  | P15374     | UHL3_HUMAN           |
|     |                                                                                                                                                                                |     |            |                      |
| 53  | IEERRSRKRVSTLVDDTSVIDDDIVNNMFFAH <sup>*</sup> QLIPNSCATHALLSVLLNCS-s--VDLG                                                                                                     | 109 | Q92560     | BAP1_HUMAN           |
| 59  | QPGEIPA-----GSVQDSRLDTIFFAKQVINNACATQAI <sup>*</sup> VSVLLNCT-HQDVHLG                                                                                                          | 108 | Q9Y5K5     | UHL5_HUMAN           |
| 57  | LKKEMRK-----EVDDSPQTCTDVYFSQ <sup>*</sup> QVIQ <sup>*</sup> NACASQALINLLNCD-HPDVDLG                                                                                            | 106 | A0A0V0WDD0 | UHL5_Trichinella Sp. |
| 56  | TAQHENFRKKQI--EEL--KGQEVSPKVYFM <sup>*</sup> KQ <sup>*</sup> TIGNSCGTIGLIHAVANNQDKLGFEDG                                                                                       | 111 | P09936     | UHL1_HUMAN           |
| 59  | TEKYEVFRTEEE--EKIKSQGDVTSSVYFM <sup>*</sup> KQ <sup>*</sup> TIS <sup>*</sup> NACGTIGLIHAIANNKDKMHFESG                                                                          | 116 | P15374     | UHL3_HUMAN           |
|     |                                                                                                                                                                                |     |            |                      |
| 110 | PTLSRMKDFTKGFSPEKGYAIGNAPELAKAHNSHAR <sup>*</sup> PEPRHLPEKQNGLSAVRTMEAF <sup>*</sup> H                                                                                        | 169 | Q92560     | BAP1_HUMAN           |
| 109 | ETLSEFKFSQSFDAAMKGLALSNSDVIRQVHNS <sup>*</sup> FAR <sup>*</sup> QMF <sup>*</sup> FDTK---TSAKEEDAF <sup>*</sup> H                                                               | 164 | Q9Y5K5     | UHL5_HUMAN           |
| 107 | PTLKEFKDFTYDLDSASRGLCLTNSKIRAVHNS <sup>*</sup> FGR <sup>*</sup> QLFE <sup>*</sup> IDDQ---QKLDEEDV <sup>*</sup> FH                                                              | 162 | A0A0V0WDD0 | UHL5_Trichinella Sp. |
| 112 | SVLKQFLSETEKMS <sup>*</sup> PEDRAKCFEKNEAIQA <sup>*</sup> AHDAVAQEGQC-----RVDDKVN <sup>*</sup> FH                                                                              | 161 | P09936     | UHL1_HUMAN           |
| 117 | STLKKFLEESVSMSP <sup>*</sup> EERARYLENYDAIRVTH <sup>*</sup> ETSAHEGQTE-----APSIDEKVDL <sup>*</sup> H                                                                           | 169 | P15374     | UHL3_HUMAN           |
|     |                                                                                                                                                                                |     |            |                      |
| 170 | FVSYPITGRLEFELDGLKVYPIDHGPGW-EDEEWDKARRVIMERI <sup>*</sup> GLATAGEPYHDIR <sup>*</sup> F                                                                                        | 228 | Q92560     | BAP1_HUMAN           |
| 165 | FVSYPVNGRLYELDGLREGPIDLGACN-Q-DDWISAVRPVIEKRI <sup>*</sup> QKYSE---GEIR <sup>*</sup> F                                                                                         | 218 | Q9Y5K5     | UHL5_HUMAN           |
| 163 | FVTYVPVNDGVYELDGLRAAPLR <sup>*</sup> LGTVASD-GDWTEVAIKAIKEK <sup>*</sup> KNYGE---SEVR <sup>*</sup> F                                                                           | 216 | A0A0V0WDD0 | UHL5_Trichinella Sp. |
| 162 | FILFNNVDGHL <sup>*</sup> YELDGRMPFPVNHGASS-EDTLKDAK-VC---REFTE-REQGEV <sup>*</sup> RF                                                                                          | 214 | P09936     | UHL1_HUMAN           |
| 170 | FIALVHVDGHL <sup>*</sup> YELDGR <sup>*</sup> KPPFINHGETS-DETLLEDAIE-VC---K <sup>*</sup> FME-RDPDEL <sup>*</sup> RF                                                             | 222 | P15374     | UHL3_HUMAN           |
|     |                                                                                                                                                                                |     |            |                      |
| 229 | NLMAVVPDRRIK-----                                                                                                                                                              | 240 | Q92560     | BAP1_HUMAN           |
| 219 | NLMAIVSDRKMI-----                                                                                                                                                              | 230 | Q9Y5K5     | UHL5_HUMAN           |
| 217 | NLMAVISDQK <sup>*</sup> LK-----                                                                                                                                                | 228 | A0A0V0WDD0 | UHL5_Trichinella Sp. |
| 215 | SAVALCKAA-----                                                                                                                                                                 | 223 | P09936     | UHL1_HUMAN           |
| 223 | NAIALSAA-----                                                                                                                                                                  | 230 | P15374     | UHL3_HUMAN           |

Supplementary Figure S2

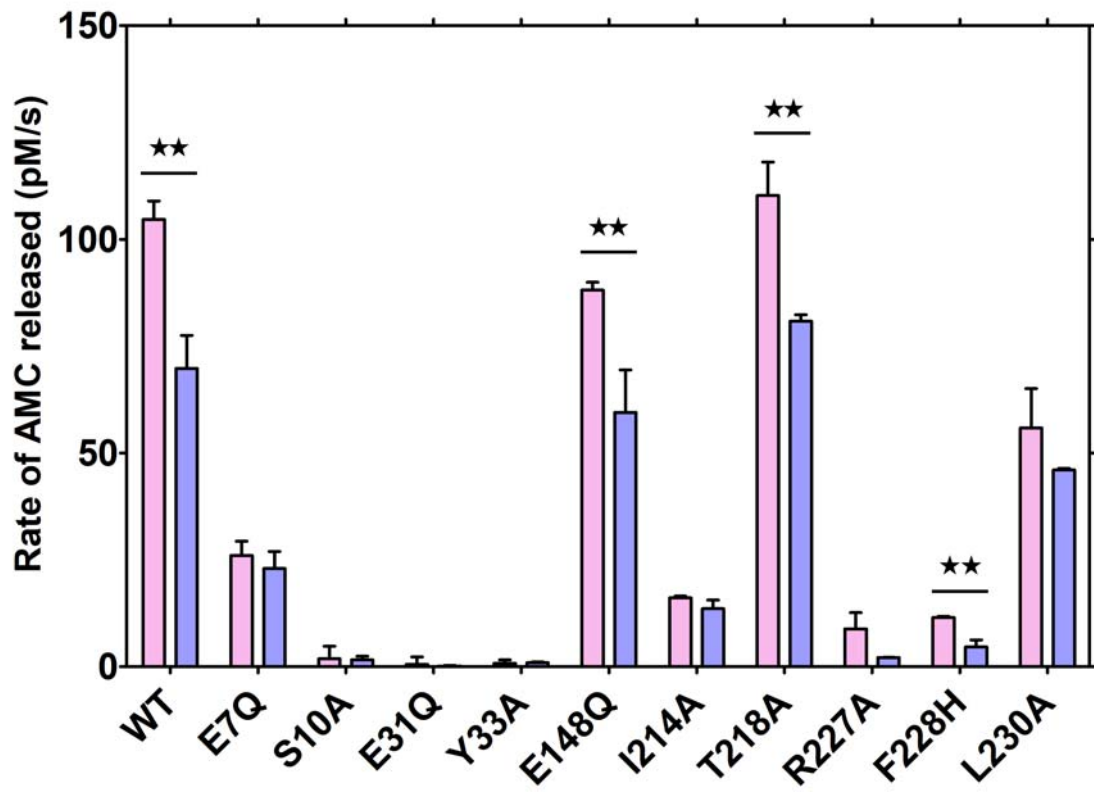

Supplementary Figure S3

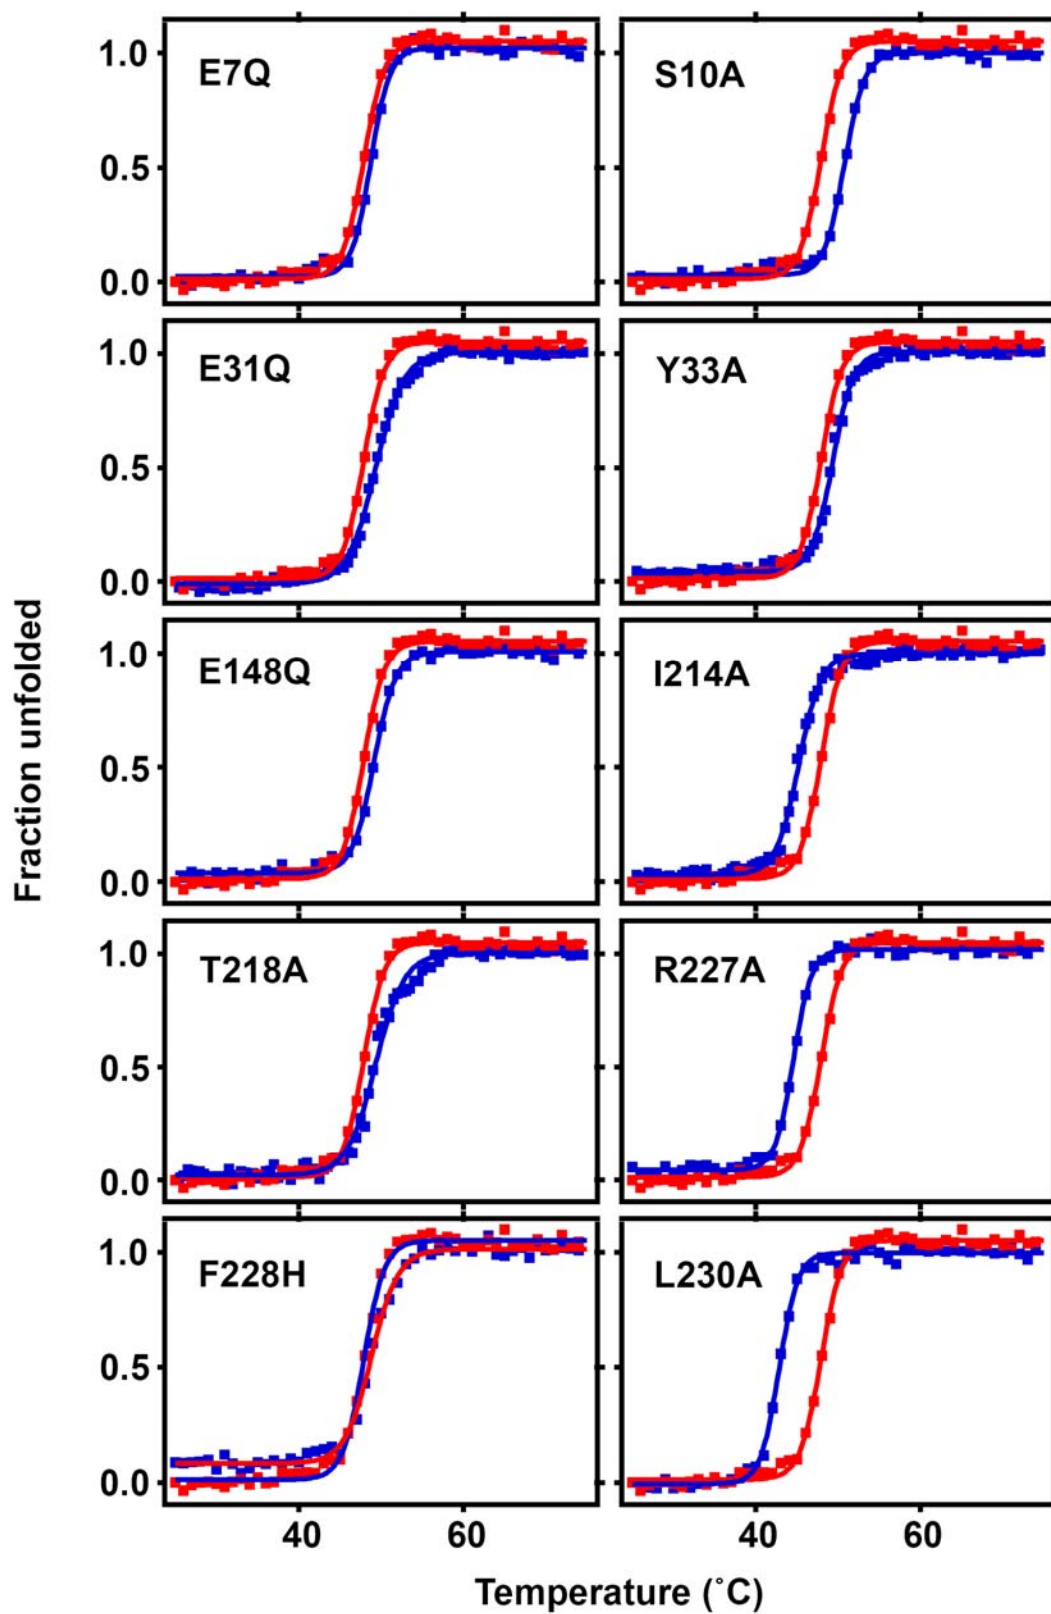

Supplementary Figure S4

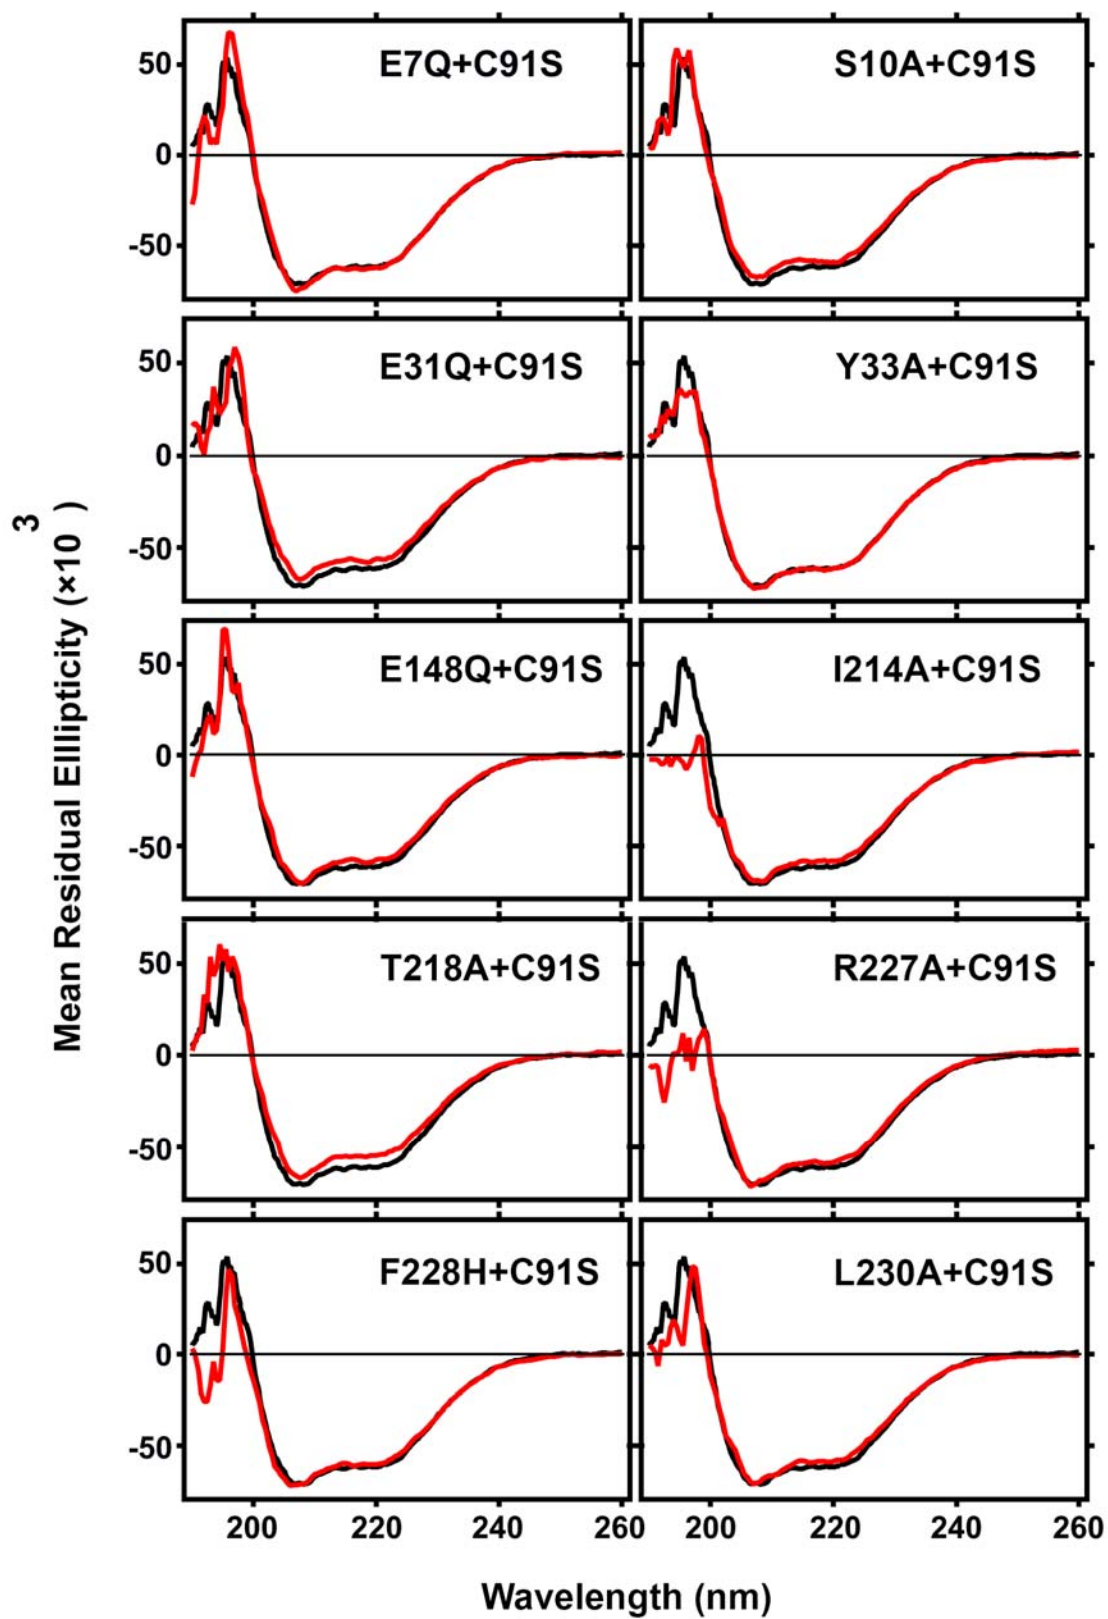

Supplementary Figure S5

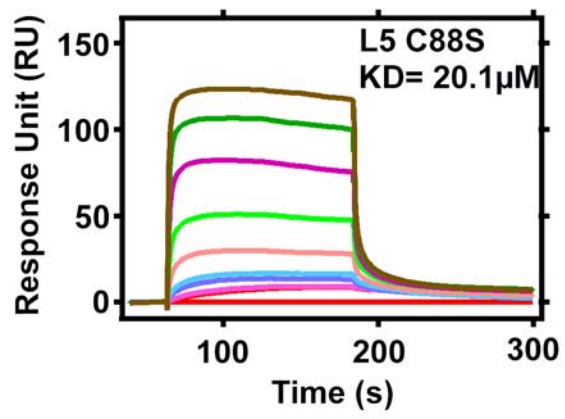



**Supplementary Table S1.** Rate of Ub-AMC Hydrolysis by wild-type BAP1N and its mutants.

| <b>Protein</b> | <b>Rate (pM/sec)</b> | <b>Fold Change</b> |
|----------------|----------------------|--------------------|
| WT             | 105.2 ± 4            | 1                  |
| E7Q            | 26.1 ± 3.3           | 4                  |
| S10A           | 0.8 ± 3.3            | 132                |
| E31Q           | 0.4 ± 2.4            | 263                |
| Y33A           | 0.7 ± 1.1            | 150                |
| E148Q          | 89.1 ± 1.2           | 1.2                |
| I214           | 16.2 ± 0.4           | 6.5                |
| T218A          | 112.1 ± 4.7          | 1                  |
| R227A          | 10.5 ± 3.5           | 10                 |
| F228H          | 11.7 ± 0.2           | 9                  |
| L230A          | 45.1 ± 6.1           | 2.3                |

**Supplementary Table S2.** Secondary structure analysis of BAP1N single mutants

| <b>BAP1 Double Mutants</b> | <b>Helix Percentage</b> | <b>Strand Percentage</b> | <b>Turn Percentage</b> | <b>Unordered Percentage</b> |
|----------------------------|-------------------------|--------------------------|------------------------|-----------------------------|
| WT                         | 20                      | 25                       | 25                     | 30                          |
| E7Q                        | 21                      | 22                       | 17                     | 40                          |
| S10A                       | 21                      | 24                       | 26                     | 30                          |
| E31Q                       | 22                      | 18                       | 16                     | 44                          |
| Y33A                       | 18                      | 24                       | 21                     | 37                          |
| E148Q                      | 20                      | 21                       | 17                     | 42                          |
| I214A                      | 19                      | 23                       | 16                     | 41                          |
| T218A                      | 18                      | 25                       | 20                     | 37                          |
| R227A                      | 19                      | 24                       | 14                     | 43                          |
| F228H                      | 20                      | 24                       | 26                     | 31                          |
| L230A                      | 20                      | 19                       | 16                     | 45                          |

**Supplementary Table S3.** Thermal melting point of wild-type BAP1N and its mutants.

| <b>Enzyme</b> | <b>T<sub>m</sub></b> | <b>Std. Dev.</b> |
|---------------|----------------------|------------------|
| WT            | 47.9                 | 0.1              |
| E7Q           | 49.3                 | 1.1              |
| S10A          | 50.8                 | 0.1              |
| E31Q          | 49.4                 | 0.2              |
| Y33A          | 49.3                 | 0.3              |
| E148Q         | 49.2                 | 0.2              |
| I214A         | 45.2                 | 0.1              |
| T218A         | 49.4                 | 0.2              |
| R227A         | 44.6                 | 0.02             |
| F228H         | 48.9                 | 0.2              |
| L230A         | 42.9                 | 0.2              |

**Supplementary Table S4.** SPR-derived binding constants for the interaction between different BAP1N double mutants and immobilized ubiquitin.

| <b>BAP1 Double Mutants</b> | <b><math>K_D</math> (<math>\mu\text{M}</math>)</b> | <b>Fold Change</b> |
|----------------------------|----------------------------------------------------|--------------------|
| C91S                       | $4 \pm 1.6$                                        | 1                  |
| E7Q                        | $5.6 \pm 1.4$                                      | 1                  |
| S10A                       | $82.4 \pm 7.1$                                     | 21                 |
| E31Q                       | $108.8 \pm 4.5$                                    | 27                 |
| Y33A                       | $51.6 \pm 4.5$                                     | 13                 |
| E148Q                      | $8.8 \pm 2.5$                                      | 2                  |
| I214A                      | $45 \pm 3.5$                                       | 11                 |
| T218A                      | $16.9 \pm 1.4$                                     | 4                  |
| R227A                      | $53.2 \pm 8.2$                                     | 13                 |
| F228H                      | $33.8 \pm 5.9$                                     | 9                  |
| L230A                      | $23.2 \pm 3.2$                                     | 6                  |
